# Supplementary material
Source: PubMed Central journal article supplement (PMC4935653)
Supplement: NIHMS749590-supplement-Supp_Fig_01-02.pdf [file NIHMS749590-supplement-Supp_Fig_01-02.pdf]

## Supplemental Materials

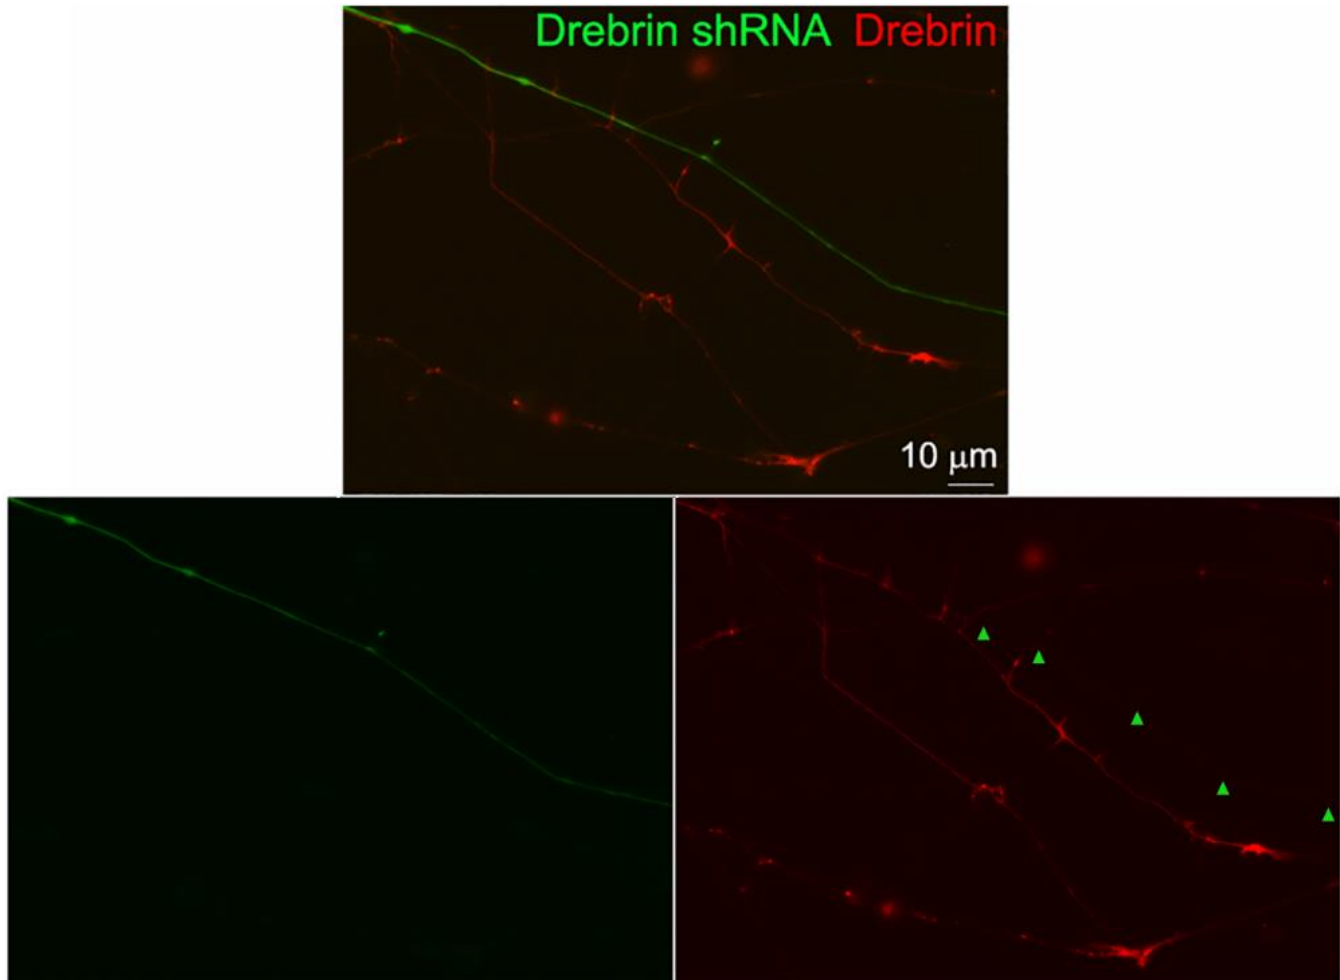

**Figure S1.** The figure shows an example of the staining levels of drebrin in the axon of a neuron expressing drebrin shRNA (GFP positive) relative to non-transfected axons in the same imaging field. The approximate location of the shRNA expressing axon is denoted by green arrowheads in the drebrin antibody staining panel (bottom right). As with the other shRNA studies, the image is representative of 72 hrs in vitro post transfection.

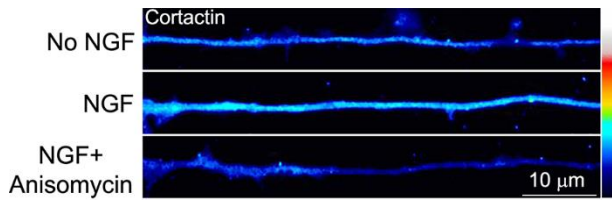

**Figure S2.** Examples of cortactin staining in axons not treated with NGF, following NGF treatment and NGF treatment with anisomycin pretreatment. This figure is in support of Figure 6C.
